# Supplementary material
Source: PubMed Central journal article supplement (PMC8810603)
Supplement: NIHMS1728578-supplement-f1C.pdf [file NIHMS1728578-supplement-f1C.pdf]

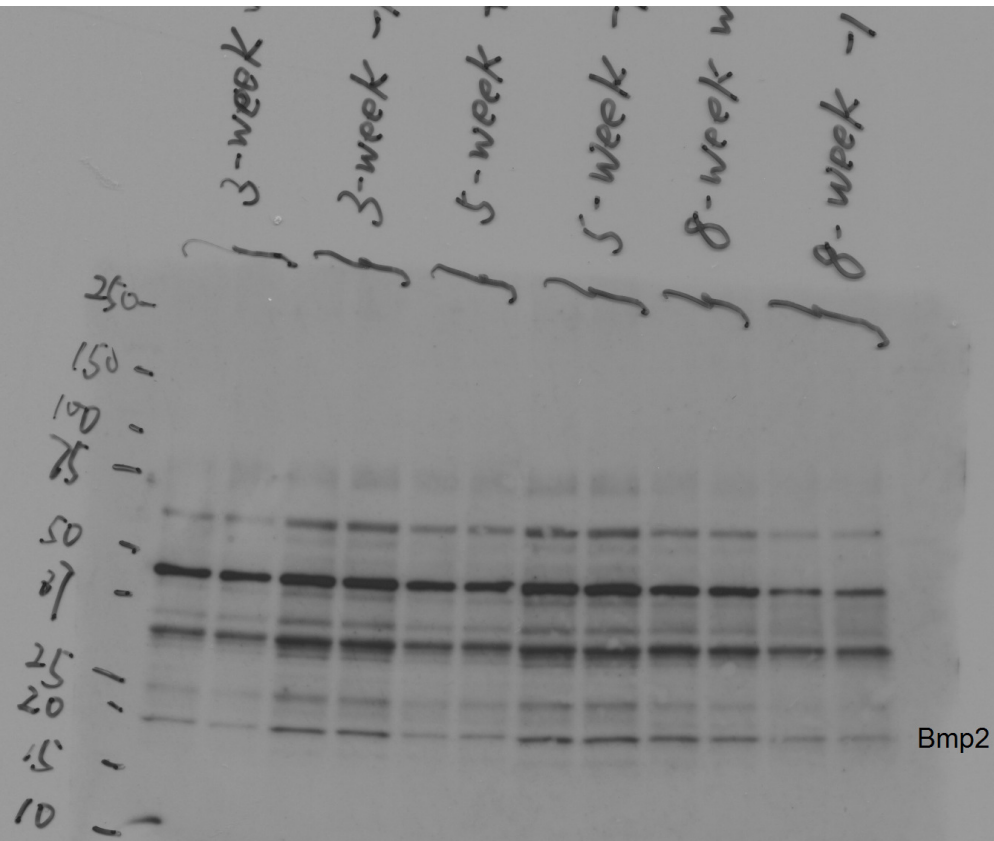

Anta

Fig. 1C-Bmp2

1/20130206-1-1

BMP2 (1:100)

1'

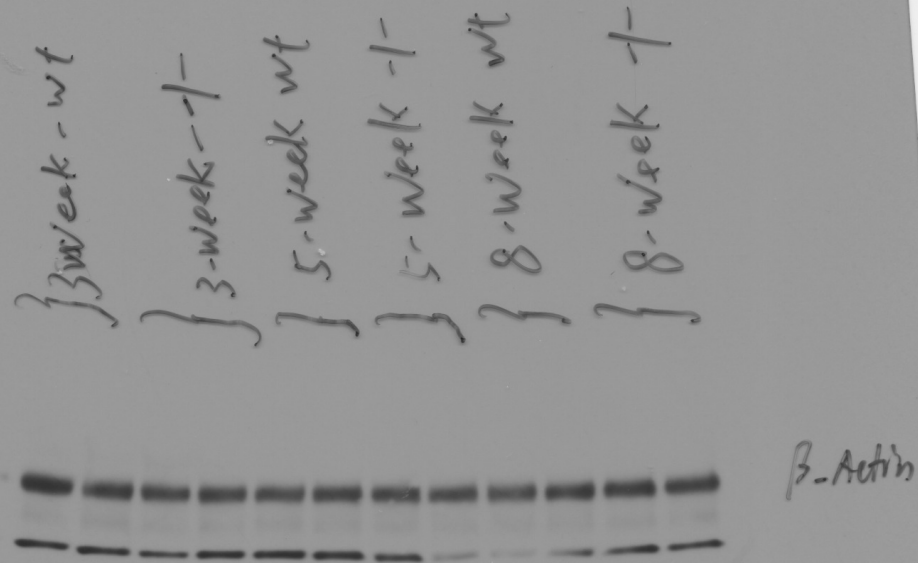

Aorta

Fig. 1C-Actin

1620130206-t2  
 Re-probed  
 $\beta$ -Actin

1:20"

Fig. 1D -Bmp4

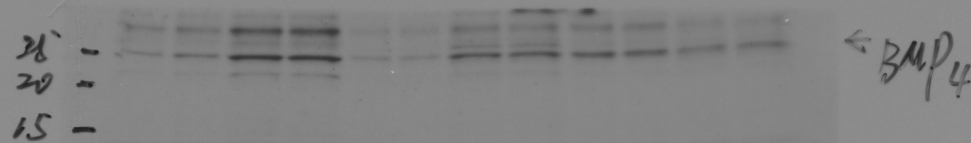

1620130123 封  
BMP4

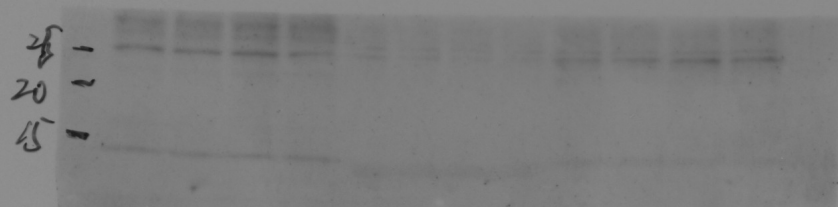

BMP12 ?

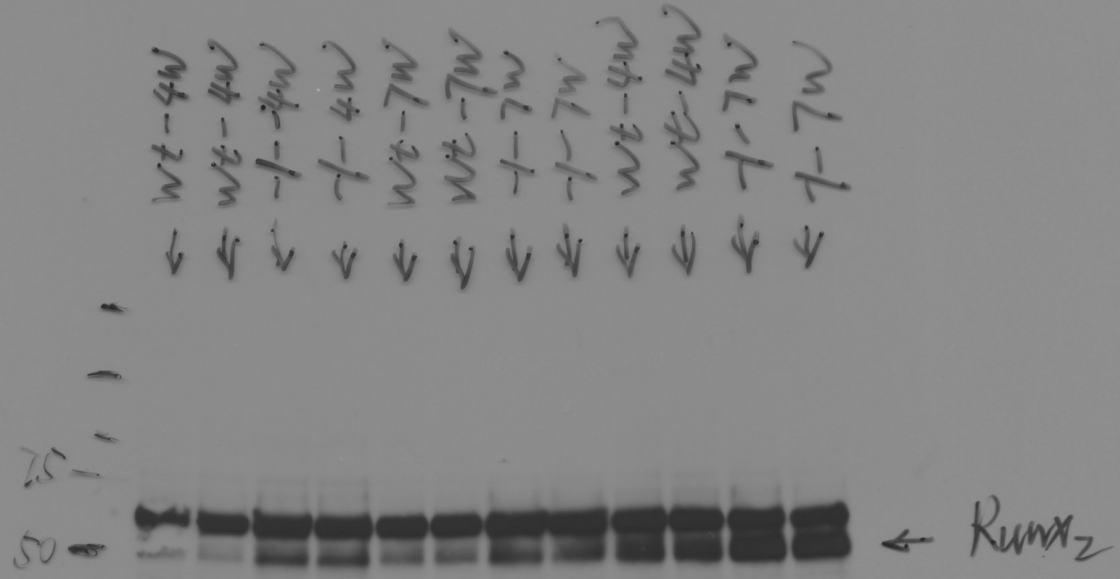

Fig. 1D-Runx2

Aorta

YL20130123-39

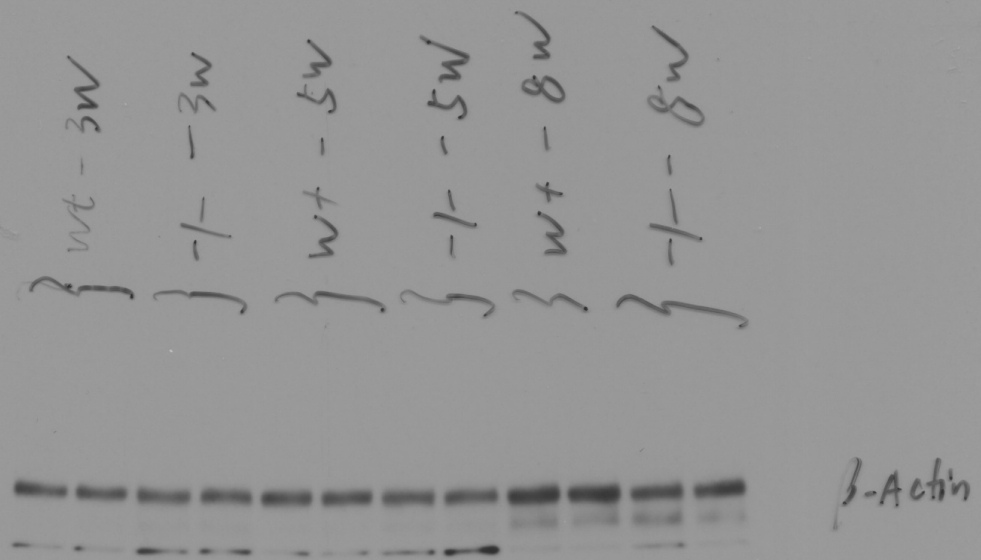

Fig. 1D-Actin

Aorta

✓ 20130123-2-1  
 Reprinted  
 $\beta$ -Actin

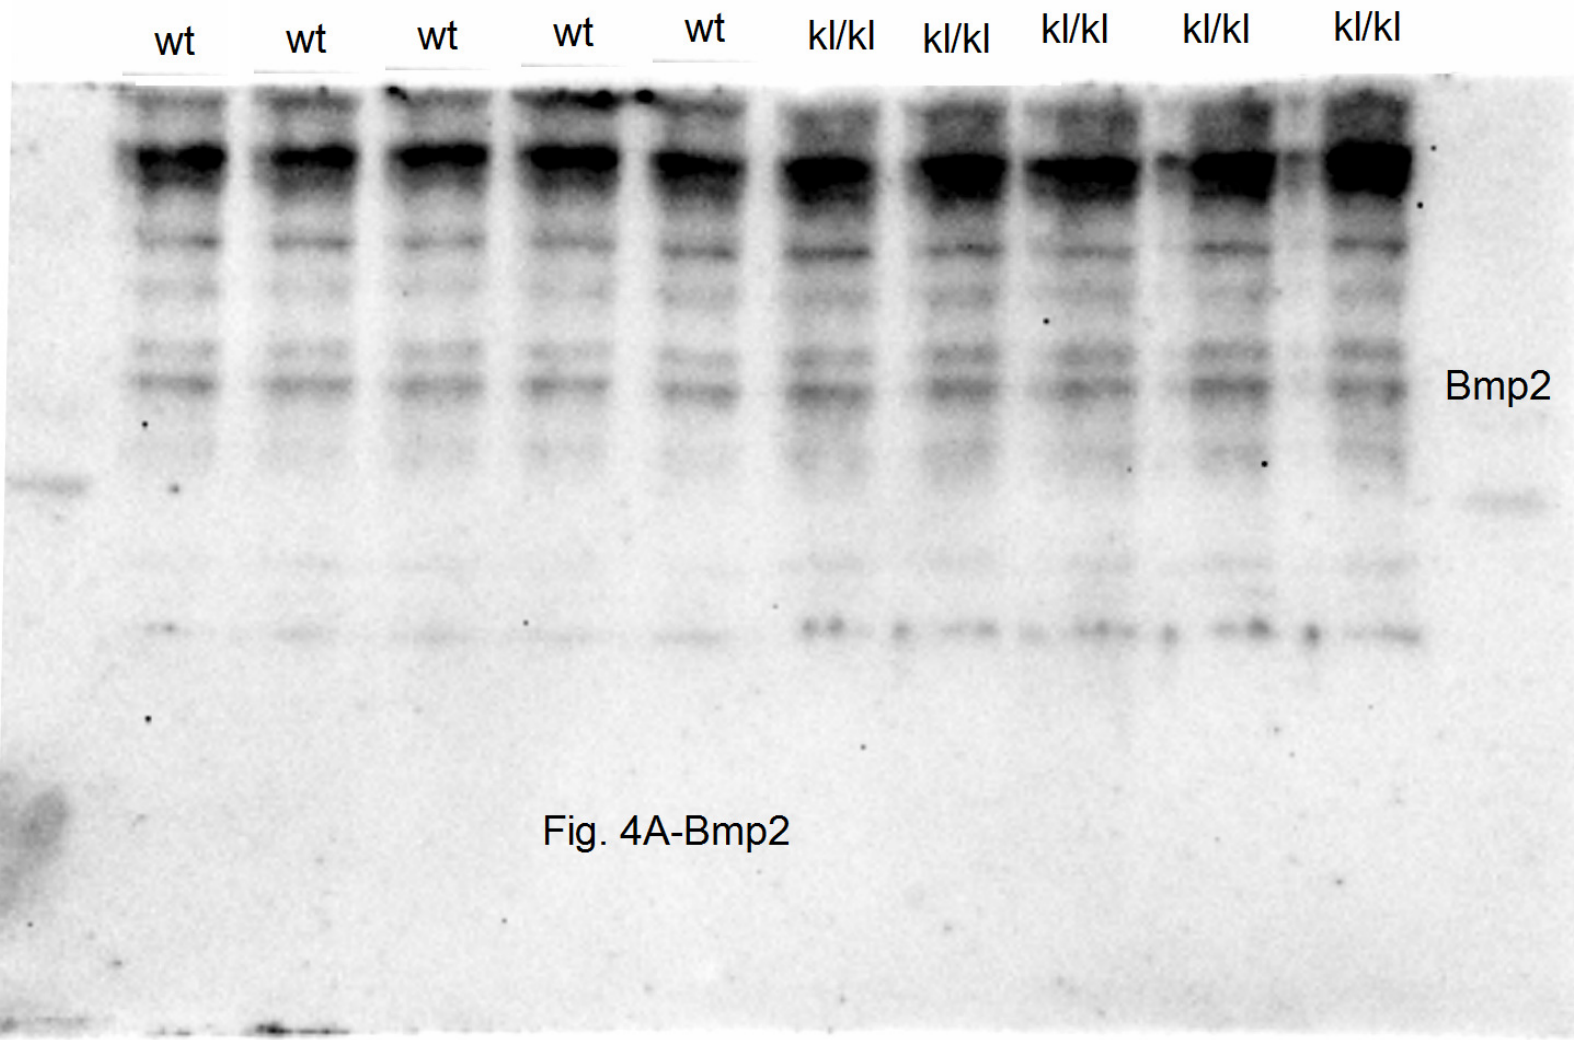

Fig. 4A-Bmp2

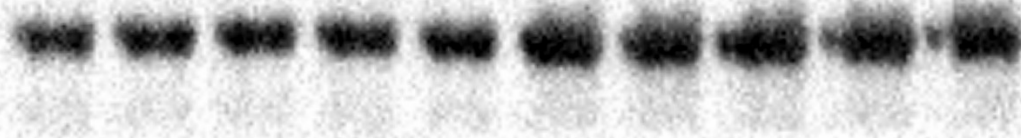

Fig. 4A-Runx2

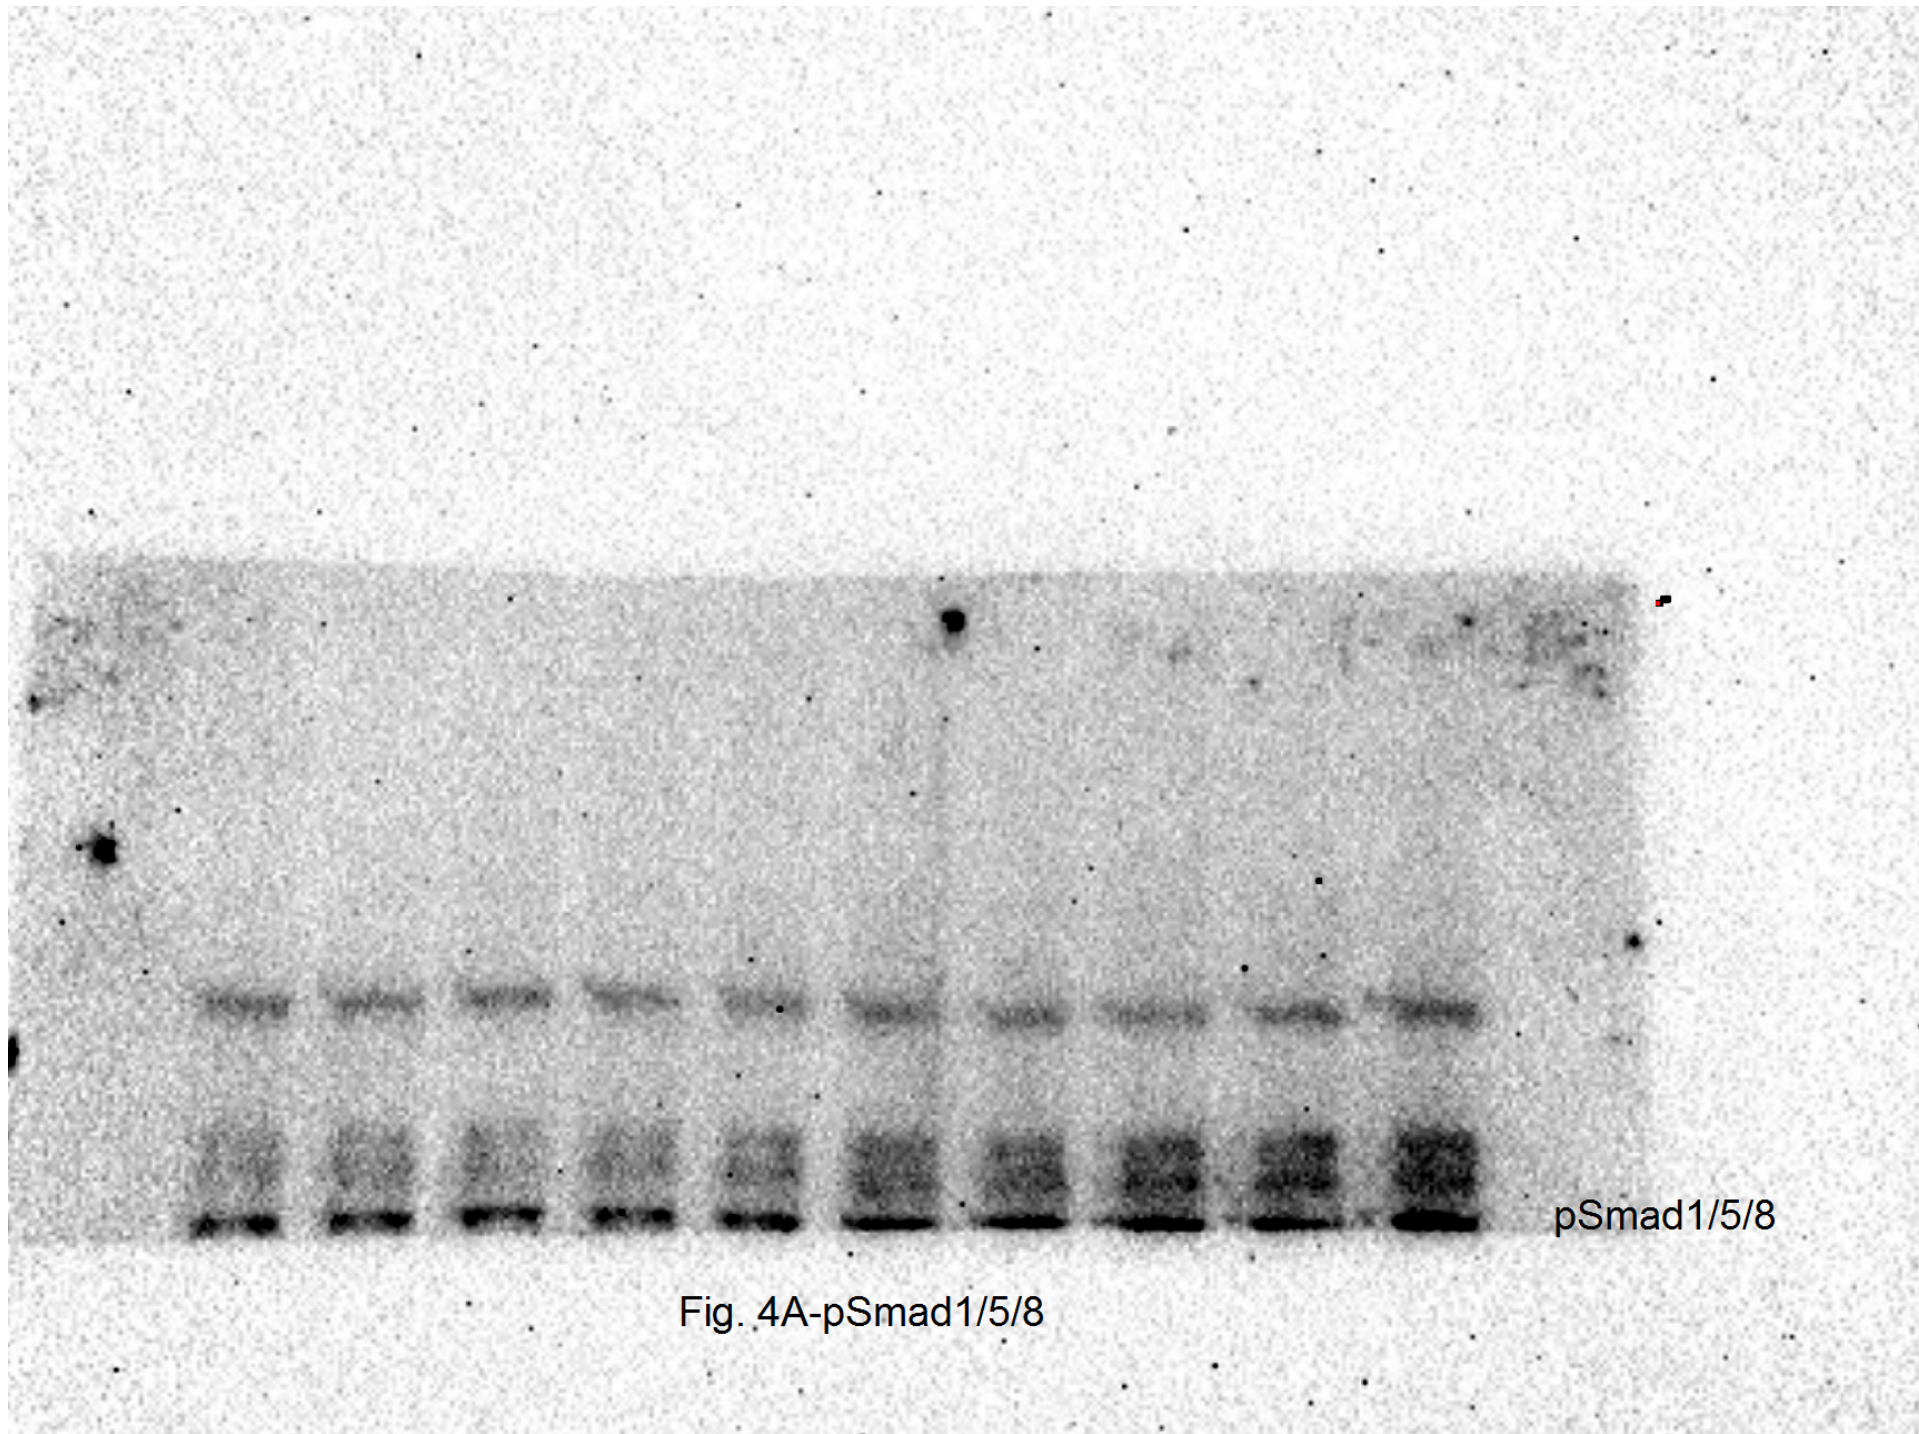

Fig. 4A-pSmad1/5/8



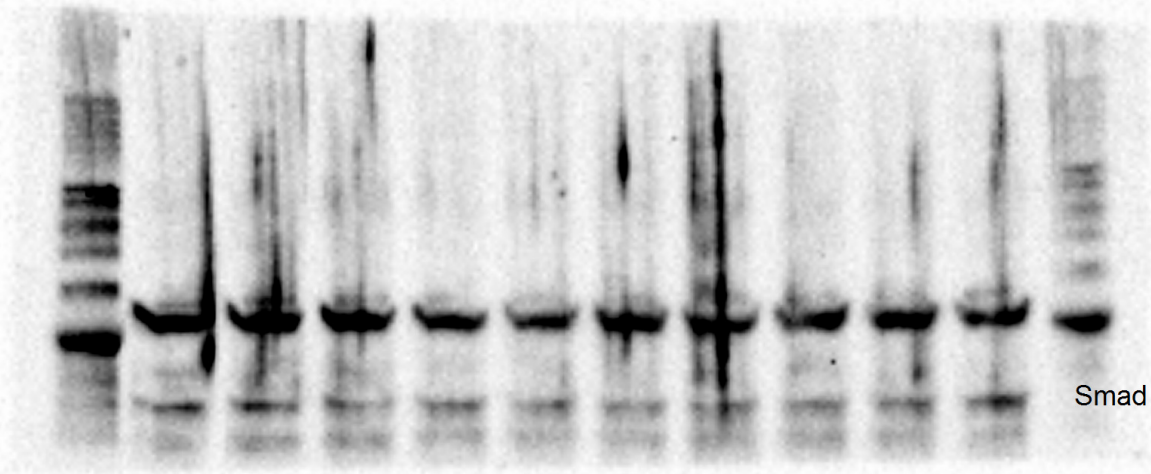

Fig. 4A-Smad

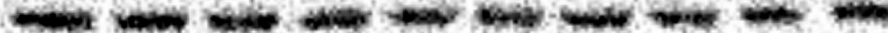

Fig. 4A-Actin

Fig. 4B-Bmp4

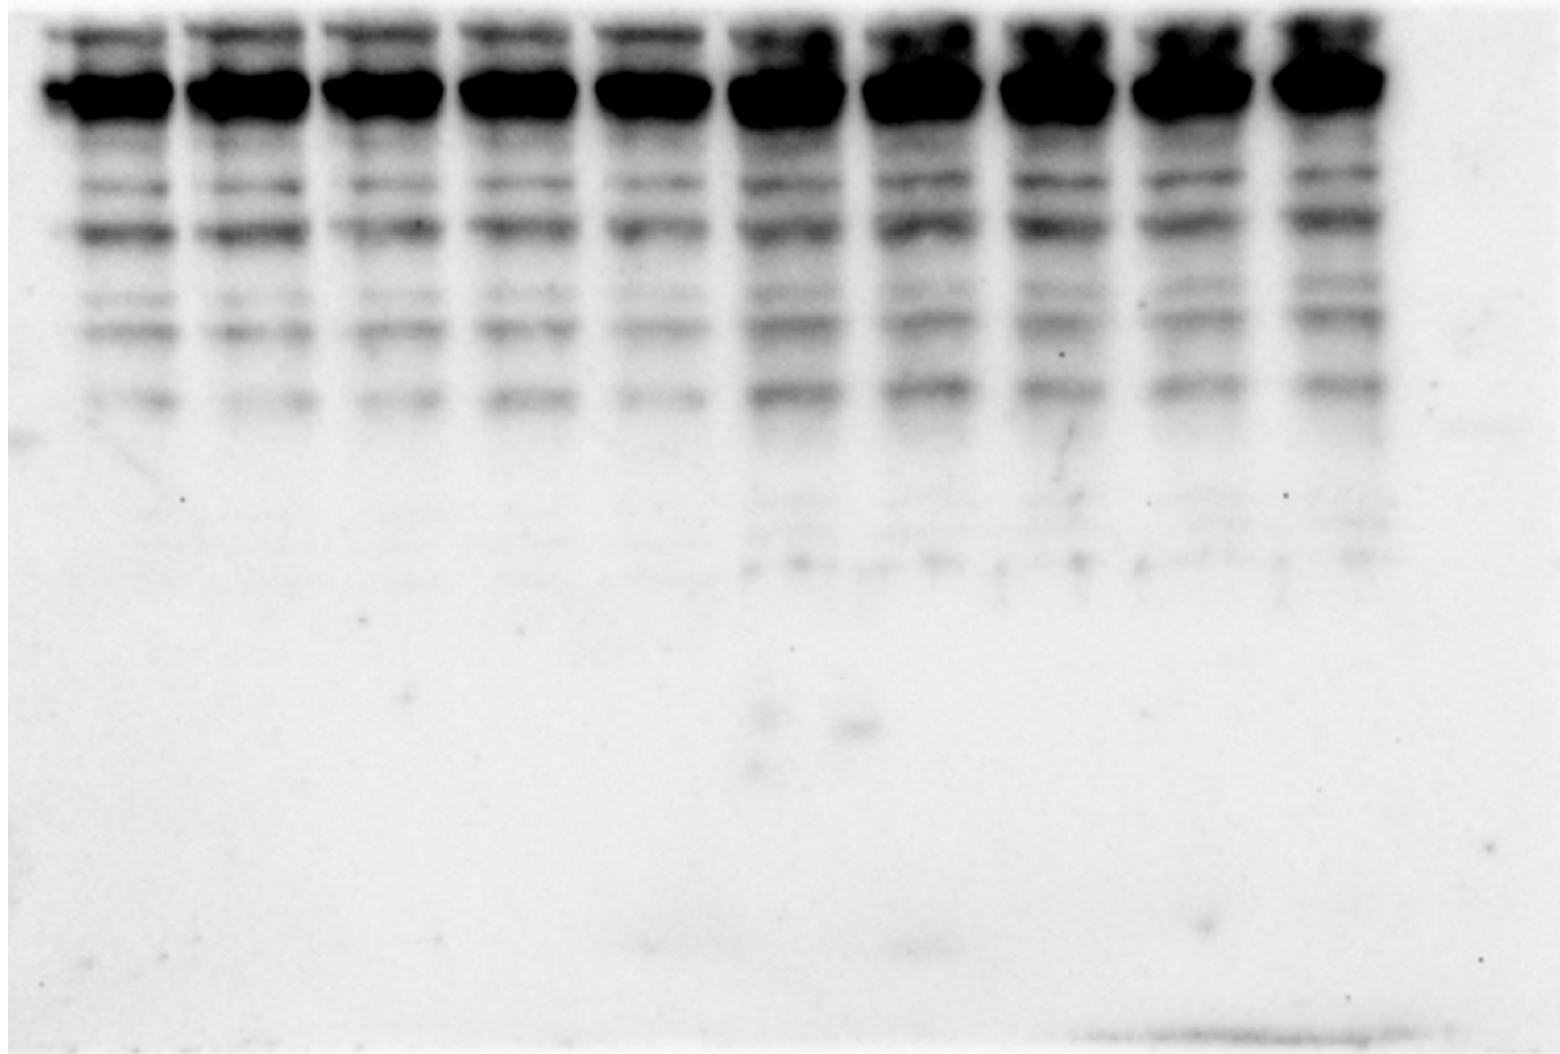

Bmp4

Fig. 4B-pSmad2/3

pSmad2/3

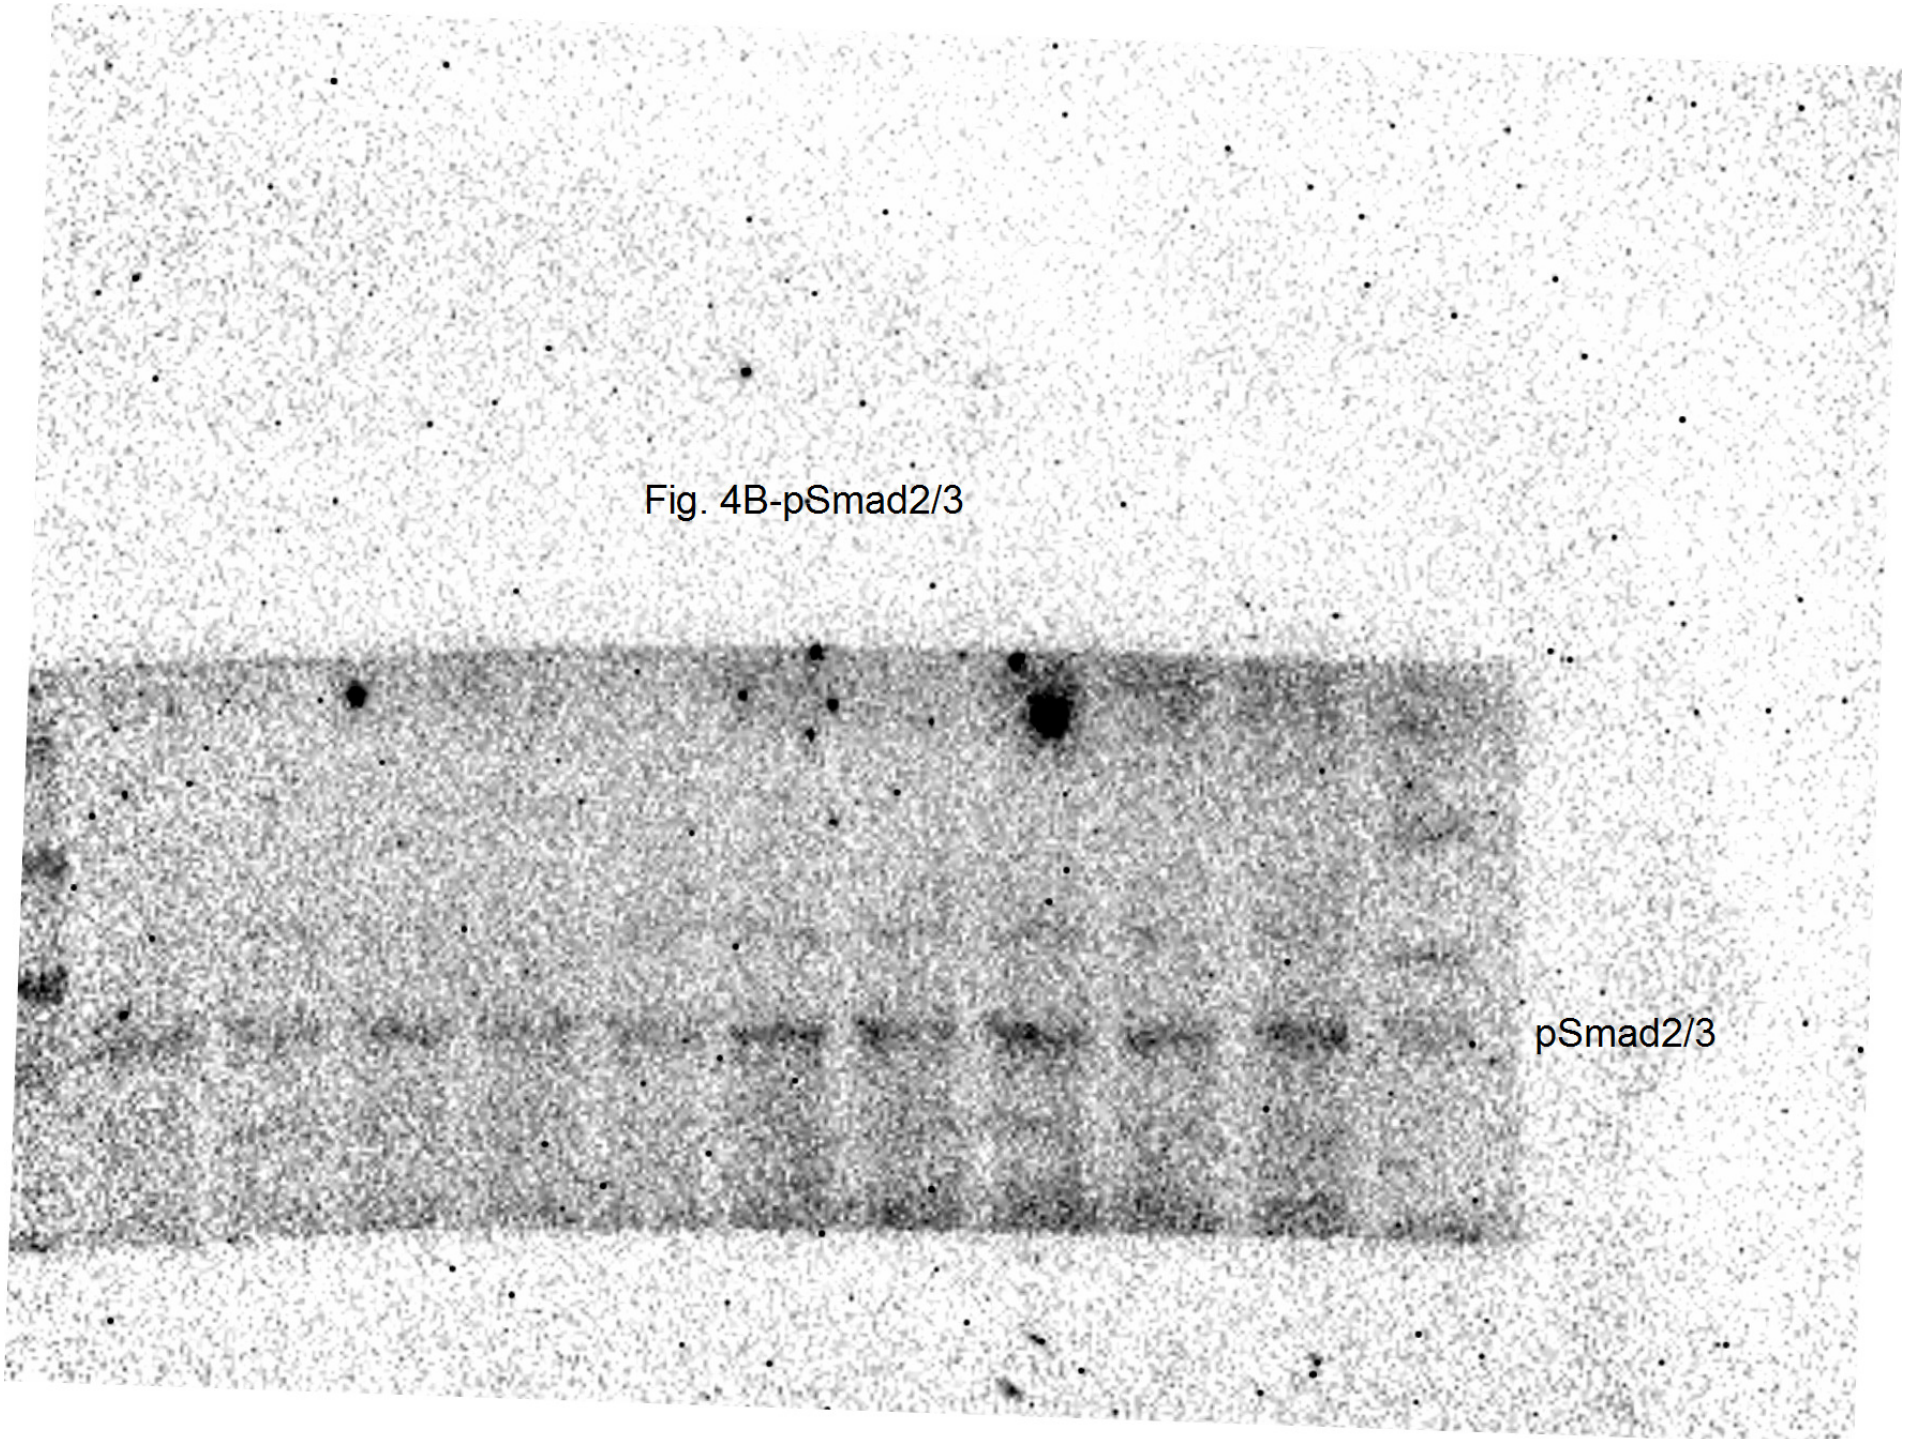

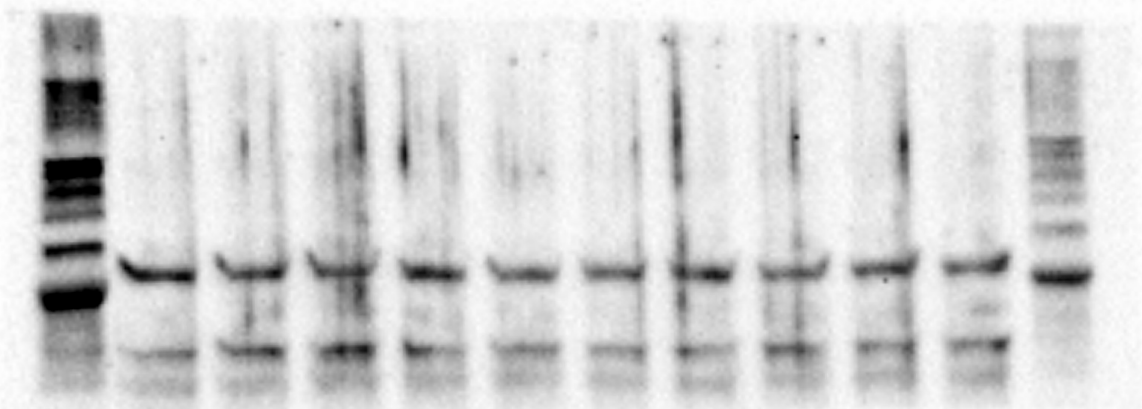

Smad

Fig. 4B-Smad

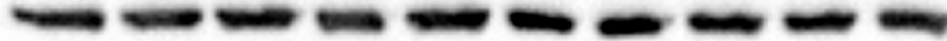

Fig. 4B-Actin

# Klotho protein in ASMCs Isolated Mutant and WT Mice

Fig. 5A-Klotho

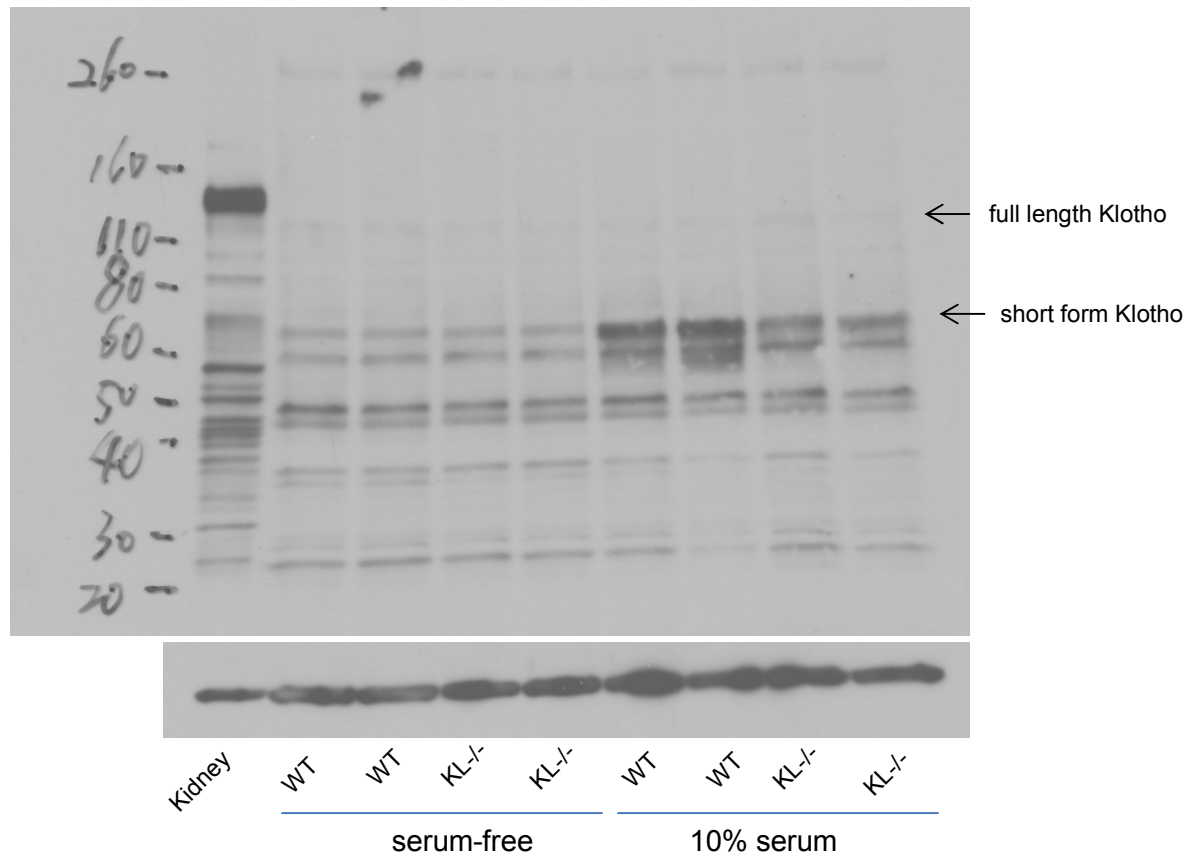

# Klotho mRNA Levels in ASMCs Isolated from Mutant and WT Mice

Fig. 5B-Klotho gene

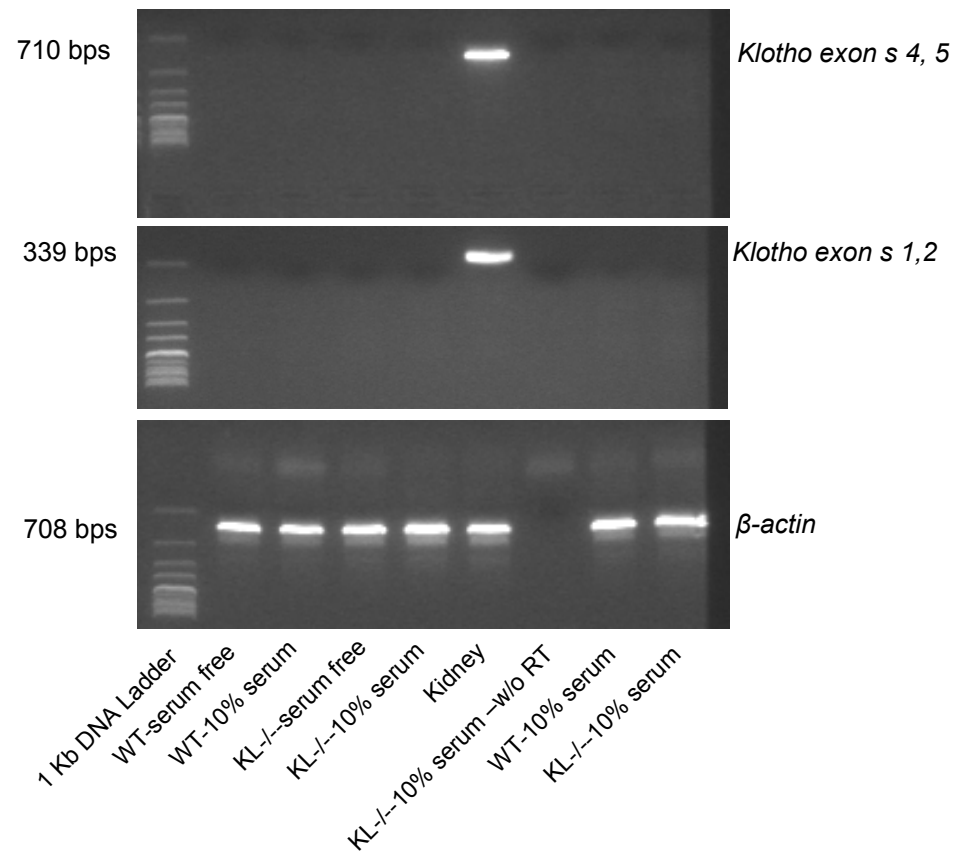



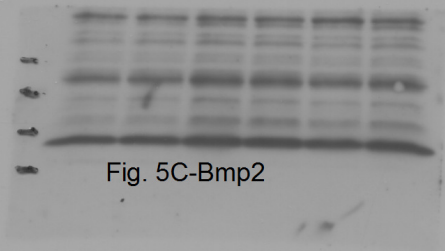

Fig. 5C-Bmp2

Bmp2

YL20130301-3-1

Bmp  
12

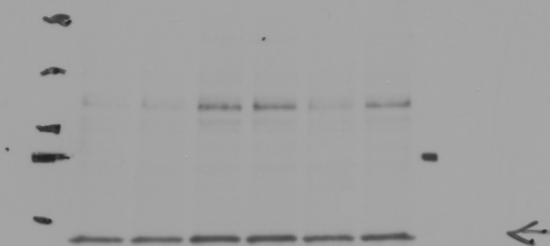

Fig. 5C-Runx2

VL20130301  
5-1

Runx2  
1:500  
1:5000  
2'

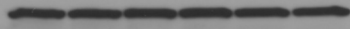

Fig. 5C-actin

Y620130301-5-1  
 $\beta$ -actin

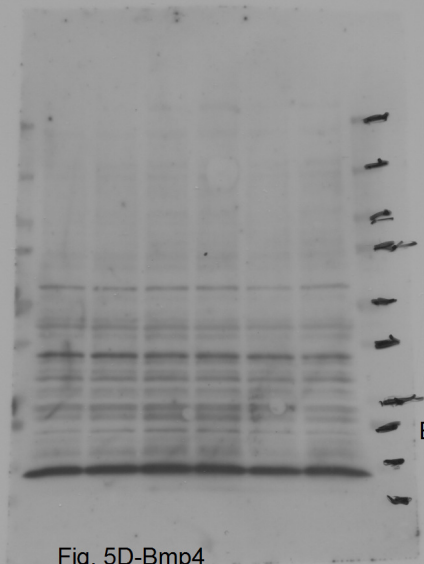

Bmp4

Fig. 5D-Bmp4

✓ 20130301-4-1  
BMP4

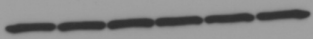

Fig. 5D-actin

162030301-3-  
B-Actin

2
